# Supplementary material
Source: PubMed Central journal article supplement (PMC10077048)
Supplement: ajcr0013-0922-f7.pdf [file ajcr0013-0922-f7.pdf]

USP33 promotes the glycolysis and growth of osteosarcoma

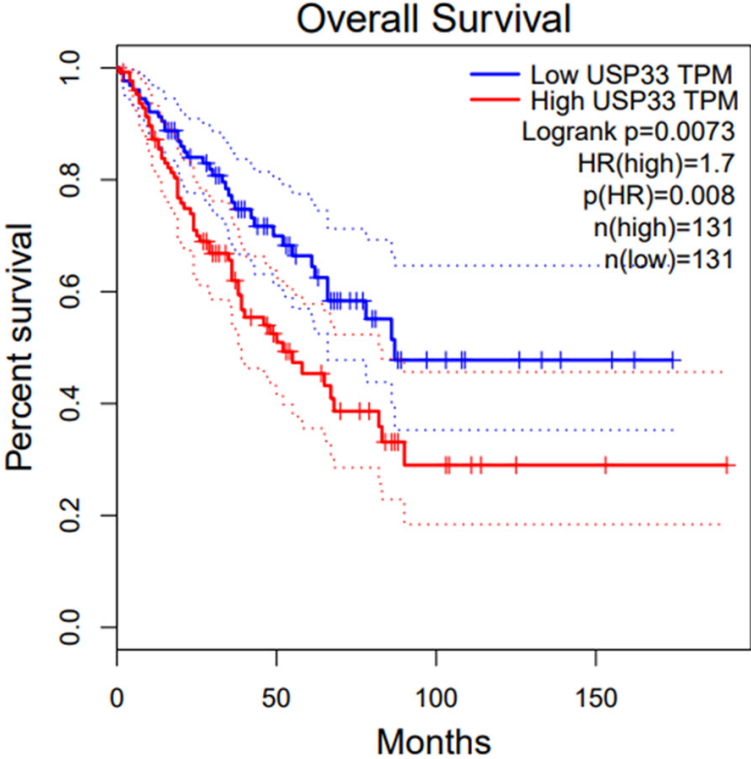

Supplementary Figure 1. High USP33 protein expression was remarkably associated with poor OS of Sarcoma patient tissues by TCGA dataset.
